## Lipid profile in a population with coronary artery disease in Madeira Island

Santos MR.<sup>1</sup>; Pereira A.<sup>1</sup>; Temtem M.<sup>1</sup>; Mendonca F.<sup>1</sup>; Sousa JA.<sup>1</sup>; Monteiro JP.<sup>1</sup>; Sousa AC.<sup>1</sup>; Freitas S.<sup>1</sup>; Henriques E.<sup>1</sup>; Ornelas I.<sup>1</sup>; Drumond A.<sup>1</sup>; Mendonca MI.<sup>1</sup>; Palma Dos Reis R.<sup>2</sup>

<sup>1</sup>Hospital Funchal, Funchal, Portugal

<sup>2</sup>Nova medical school, Lisboa, Portugal

**Funding Acknowledgements:** Type of funding sources: None.

**Introduction:** Coronary artery disease (CAD) remains a leading cause of morbidity and mortality worldwide. We know that plasma level of LDL cholesterol (LDL-C) is strongly associated with atherosclerosis, and its reduction with statins has led to a decrease in the incidence and complications of CAD. According to the 2019 ESC guidelines, in high-risk patient the aim is to achieve an absolute LDL-C treatment goal of <55mg/dL. 2016 ESC guidelines purposed, in the same patients, a LDL-C level of <70mg/dL.

**Objective:** To evaluate the degree of LDL-C control in coronary artery disease patients according to ESC guidelines.

**Materials and Methods:** Study analyses of 1687 patients selected from GENEMACOR study population, with at least one > 75% coronary stenosis by angiography (median age 53.3 ± 3 years and 54.8% men).

LDL-C was determined by chemical methods and all patients were statin treated. The population was divided in four groups according to LDL-C levels: inferior to 55mg/dL, inferior to 70mg/dL, inferior to 115mg/dL and superior to 115mg/dL.

**Results:** LDL-C mean value was 108.7mg/dL, median 105.1mg/dL (P25 83.0 and P75 127.4mg/dL). 150 (8.9%) patients had LDL-C < 55mg/dL vs 1537 (91.1%) with LDL-C ≥ 55 mg/dl. 275 (16.3%) patients had LDL-C < 70 mg/dL vs 1412 (83.7%) with LDL-C ≥ 70 mg/dL. 1084 (64.3%) patients had LDL < 115 mg/dL vs 603 (35.7%) with LDL-C ≥ 115 mg/dL.

**Conclusion:** In our population LDL-C control levels was low, with 91.1% patients with LDL-C ≥ 55mg/dL and 83.7% patients with LDL ≥ 70 mg/dL. It is interesting to note that most of our patients have LDL-C levels above the recommend by the newest and, surprisingly, the 2016 dyslipidemia guidelines. It is therefore important to implement a more intensive treatment strategy of dyslipidemia in coronary patients.
